# Supplementary material
Source: HighWire-hosted journal article supplement (https://bmjopen.bmj.com/content/13/4/e065929)
Supplement: inline-supplementary-material-2 [file inline-supplementary-material-2.pdf]

## Annex 2

**Table S1** number of units needed for treatment of children 1-59 months

| Medicine name                    | Acceptable formulation       | NUNT |
|----------------------------------|------------------------------|------|
| Oral rehydration salts           | Powder sachet 200 ml         | 2    |
|                                  | Powder sachet 500 ml         | 2    |
|                                  | Powder sachet 1L             | 1    |
| Zinc sulphate                    | Cap/tab 20 mg                | 14   |
| Carbamazapine                    | Cap/tab 100 mg               | 60   |
|                                  | Oral liquid 100 mg/5 ml      | 180  |
| Phenobarbital                    | Cap/tab 30 mg                | 60   |
|                                  | Cap/tab 100 mg               | 30   |
|                                  | Injection 100 mg/ml          | 30   |
|                                  | Injection 200 mg/ml          | 15   |
|                                  | Oral liquid 15 mg/5 ml       | 600  |
| Phenytoin                        | Cap/tab 25 mg                | 90   |
|                                  | Cap/tab 50 mg                | 60   |
|                                  | Cap/tab 100 mg               | 60   |
|                                  | Injection 50 mg/ml           | 60   |
|                                  | Oral liquid 25 mg/5 ml       | 480  |
|                                  | Oral liquid 30 mg/5 ml       | 420  |
| Lamotrigine                      | Cap/tab 25 mg                | 60   |
|                                  | Cap/tab 50 mg                | 30   |
|                                  | Cap/tab 100 mg               | 30   |
| Valproic acid                    | Cap/tab 100 mg               | 60   |
|                                  | Cap/tab 150 mg               | 60   |
|                                  | Cap/tab 200 mg               | 60   |
|                                  | Cap/tab 500 mg               | 30   |
|                                  | Oral liquid 200 mg/5 ml      | 240  |
| Diazepam                         | Rectal solution 5 mg/ml      | 1    |
|                                  | Injection 5 mg/ml            | 1    |
| Lorazepam                        | Parenteral solution 2 mg/ml  | 0.5  |
|                                  | Parenteral solution 4 mg/ml  | 0.5  |
| Midazolam                        | Oromucosal solution 5 mg/ml  | 10   |
|                                  | Oromucosal solution 10 mg/ml | 6    |
|                                  | Ampoule 10 mg/ml             | 6    |
| Abacavir/lamivudine              | Cap/tab 120/60 mg            | 60   |
| Dolutegravir                     | Cap/tab 10 mg                | 60   |
| Lopinavir/ritonavir              | Cap/tab 40/10 mg             | 120  |
|                                  | Cap/tab 100/25 mg            | 60   |
| Ferrous salt                     | Cap/tab 60 mg                | 28   |
|                                  | Cap/tab 200 mg               | 14   |
|                                  | Oral liquid 25 mg/ml         | 56   |
| Albendazole                      | Cap/tab 200 mg               | 2    |
|                                  | Cap/tab 400 mg               | 1    |
| Mebendazole                      | Cap/tab 100 mg               | 6    |
| Artemether/lumefantrine          | Cap/tab 20/120 mg            | 6    |
| Artesunate/amodiaquine           | Cap/tab 25/67.5 mg           | 6    |
|                                  | Cap/tab 50/135 mg            | 3    |
| Artesunate/mefloquine            | Cap/tab 25/55 mg             | 6    |
| Dihydroartemisinin/piperavaquine | Cap/tab 20/160 mg            | 6    |

|                                                    |                                                              |     |
|----------------------------------------------------|--------------------------------------------------------------|-----|
|                                                    | Cap/tab 20/320 mg                                            | 3   |
| Artesunate/Sulfadoxine-pyrimethamine               | Cap/tab 50/500/25 mg                                         | 1   |
|                                                    | Cap/tab 500/25 mg (sulfadoxine-pyrimethamine)                | 1   |
| Chloroquine                                        | Cap/tab 100 mg                                               | 5   |
|                                                    | Oral liquid 50 mg/5 ml                                       | 30  |
| Artesunate                                         | Cap/tab 50 mg                                                | 3   |
|                                                    | Suppository 50 mg                                            | 3   |
| Retinol                                            | Cap/tab 25,000 IU                                            | 4   |
|                                                    | Cap/tab 100,000 IU                                           | 2   |
|                                                    | Cap/tab 200,000 IU                                           | 2   |
| Paracetamol                                        | Cap/tab 100 mg                                               | 150 |
|                                                    | Suppository 100 mg                                           | 150 |
|                                                    | Suspension 120 or 125 mg/5 ml                                | 900 |
| Morphine                                           | Cap/tab (slow release) 10 mg                                 | 60  |
|                                                    | Injection 10 mg/ampoule                                      | 30  |
|                                                    | Oral liquid 10 mg/5 ml                                       | 300 |
| Ibuprofen                                          | Cap/tab 200 mg                                               | 90  |
|                                                    | Oral liquid 200 mg/5 ml                                      | 180 |
| Ethambutol + isoniazid + pyrazinamide + rifampicin | Cap/tab 100 mg (ethambutol)                                  | 60  |
|                                                    | Cap/tab 400 mg (ethambutol)                                  | 30  |
|                                                    | Oral liquid 25 mg/ml (ethambutol)                            | 9   |
|                                                    | Cap/tab 50/150/75 mg (isoniazid + pyrazinamide + rifampicin) | 60  |
| Amoxicillin                                        | Cap/tab 250 mg                                               | 20  |
|                                                    | Cap/tab 500 mg                                               | 10  |
|                                                    | Powder for injection 250 mg/vial                             | 20  |
|                                                    | Powder for injection 500 mg/vial                             | 10  |
|                                                    | Powder for injection 1 g/vial                                | 5   |
|                                                    | Suspension 125 mg/5 ml                                       | 100 |
|                                                    | Suspension 250 mg/5 ml                                       | 90  |
| Amoxicillin + clavulanic acid                      | Cap/tab 100/125 mg                                           | 30  |
|                                                    | Cap/tab 250/125 mg                                           | 15  |
|                                                    | Cap/tab 500/125 mg                                           | 15  |
|                                                    | Powder for injection 500/100 mg/vial                         | 8   |
|                                                    | Oral liquid 125/53.25 mg/5 ml                                | 135 |
|                                                    | Oral liquid 250/62.5 mg/5 ml                                 | 60  |
| Ampicillin                                         | Cap/tab 250 mg                                               | 40  |
|                                                    | Cap/tab 500 mg                                               | 20  |
|                                                    | Injection 500 mg/vial                                        | 20  |
|                                                    | Injection 1 g/vial                                           | 10  |
| Benzylpenicillin                                   | Injection 1 MIU/vial                                         | 5   |
| Gentamicin                                         | Injection 10 mg/ml                                           | 40  |
|                                                    | Injection 40 mg/ml                                           | 10  |
| Ceftriaxone                                        | Injection 250 mg/vial                                        | 28  |
|                                                    | Injection 500 mg/vial                                        | 14  |
|                                                    | Injection 1 g/vial                                           | 7   |
| Cefotaxime                                         | Injection 1 g/vial                                           | 18  |
| Procaine benzylpenicillin                          | Injection 1 MIU/vial                                         | 10  |
